# Supplementary material
Source: PubMed Central journal article supplement (PMC8977055)
Supplement: joces-135-259297-s1.pdf [file joces-135-259297-s1.pdf]

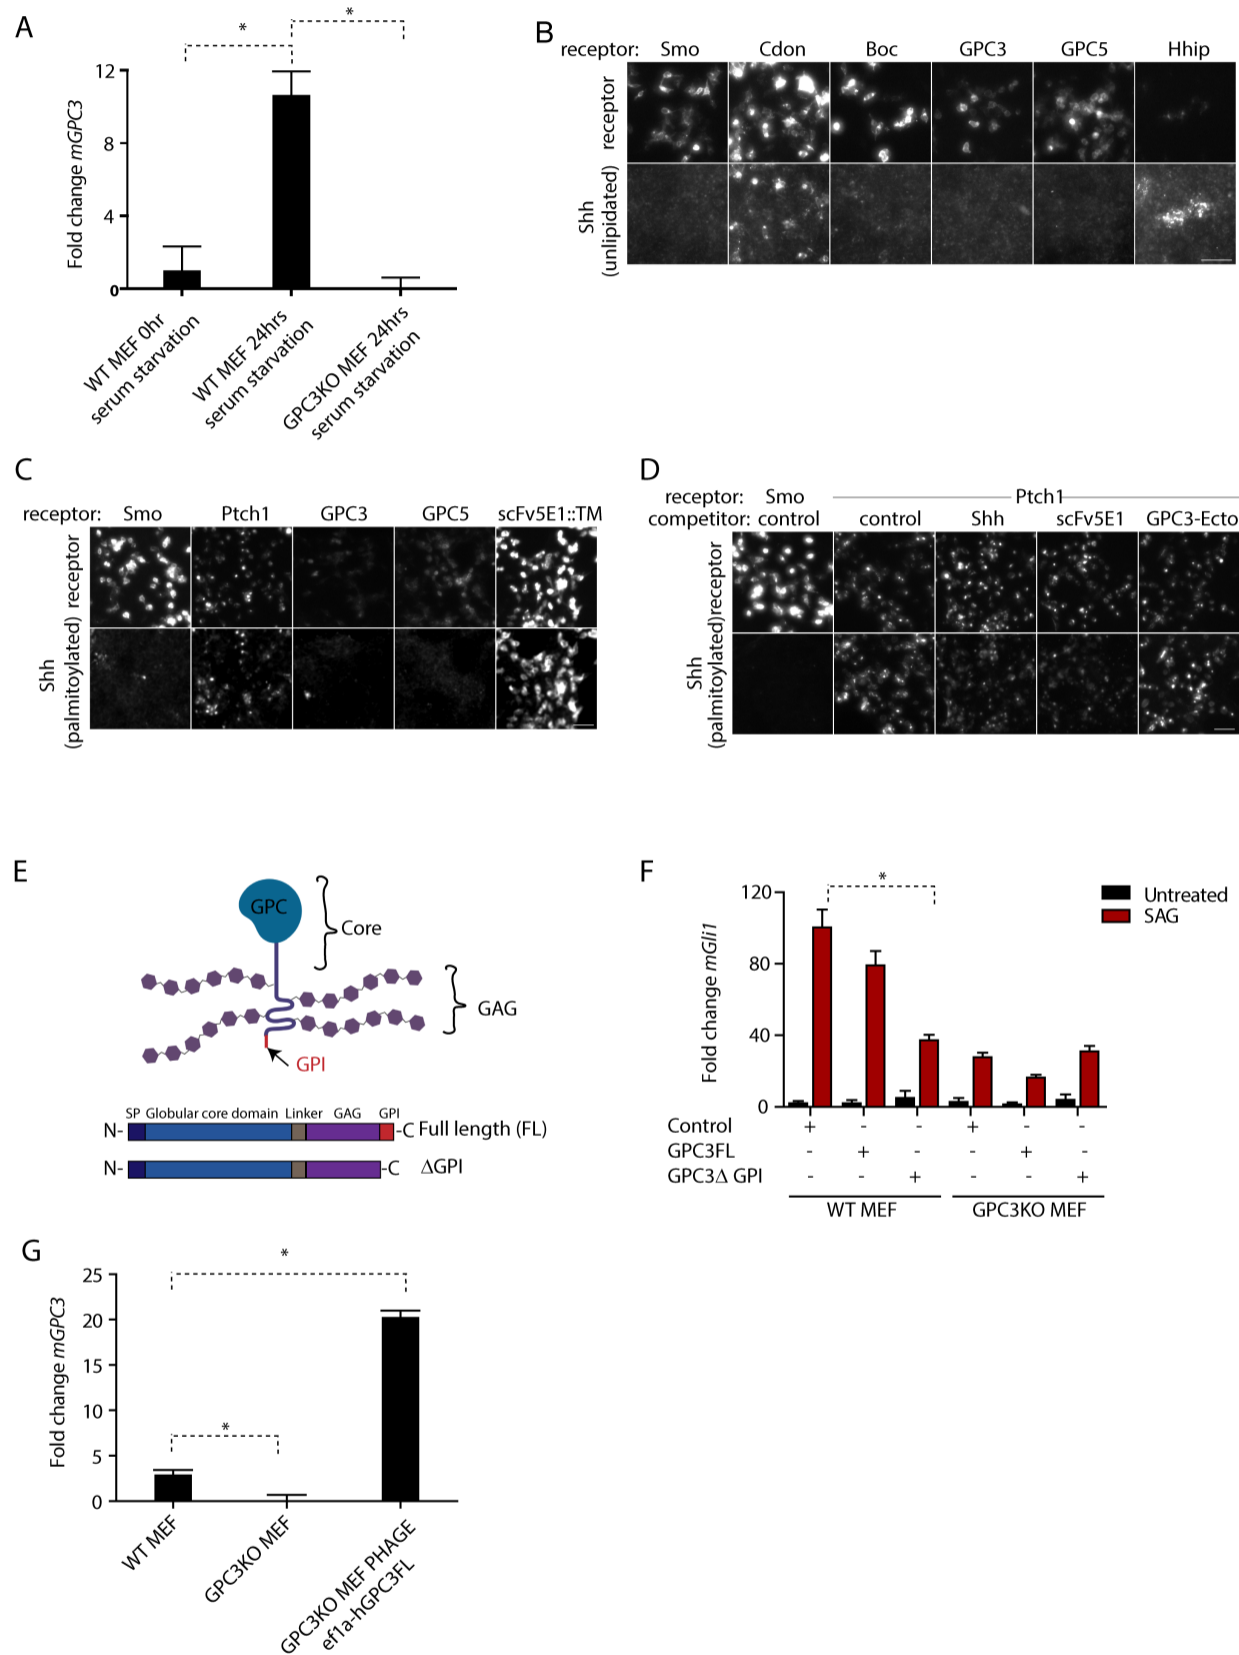

**Fig. S1. Related to Figure 1**

(A) WT or *Gpc3*<sup>KO</sup> MEFs were serum-starved for the indicated time, and levels of *mGPC3* transcript were measured by qRT-PCR. Bars show average fold-change for three replicates, and error bars show SEM. \* denotes statistical significance,  $p < 0.05$ . *mGPC3* transcripts are present in WT, but not *Gpc3*<sup>KO</sup>, MEFs. Serum starvation increases *mGPC3* transcript levels.

(B) Representative fluorescence micrographs for the experiment quantified in Figure 1B, showing expression of eGFP-tagged receptors (top) and corresponding binding of AlexaFluor 594-labeled unlipidated Shh (bottom). Scale bar = 50 $\mu$ m.

(C) As in (B), but for the experiment quantified in Figure 1C, showing binding of TMR-labeled palmitoylated Shh (bottom). Scale bar = 50 $\mu$ m.

(D) As in (C), but for the experiment quantified in Figure 1D. Scale bar = 50 $\mu$ m.

(E) Cartoon representation of full length (FL) and  $\Delta$ GPI GPC3 constructs.

(F) WT or *Gpc3*<sup>KO</sup> MEFs, transduced with constructs expressing GPC3 FL or GPC3  $\Delta$ GPI, were incubated with SAG (1 $\mu$ M) or control media for 24 hours, and Hh signaling was measured by qRT-PCR for *Gli1*. GPC3 $\Delta$ GPI expression inhibits Hh signaling in WT cells. Bars show average fold-change for three replicates, and error bars show SEM. \* denotes statistical significance,  $p < 0.05$ .

(G) *mGPC3* transcript levels were measured by qRT-PCR in WT MEFs, *Gpc3*<sup>KO</sup> MEFs, and *Gpc3*<sup>KO</sup> MEFs transduced with a lentivirus expressing GPC3 FL. Bars show average fold-change for three replicates, and error bars show SEM. \* denotes statistical significance,  $p < 0.05$ .

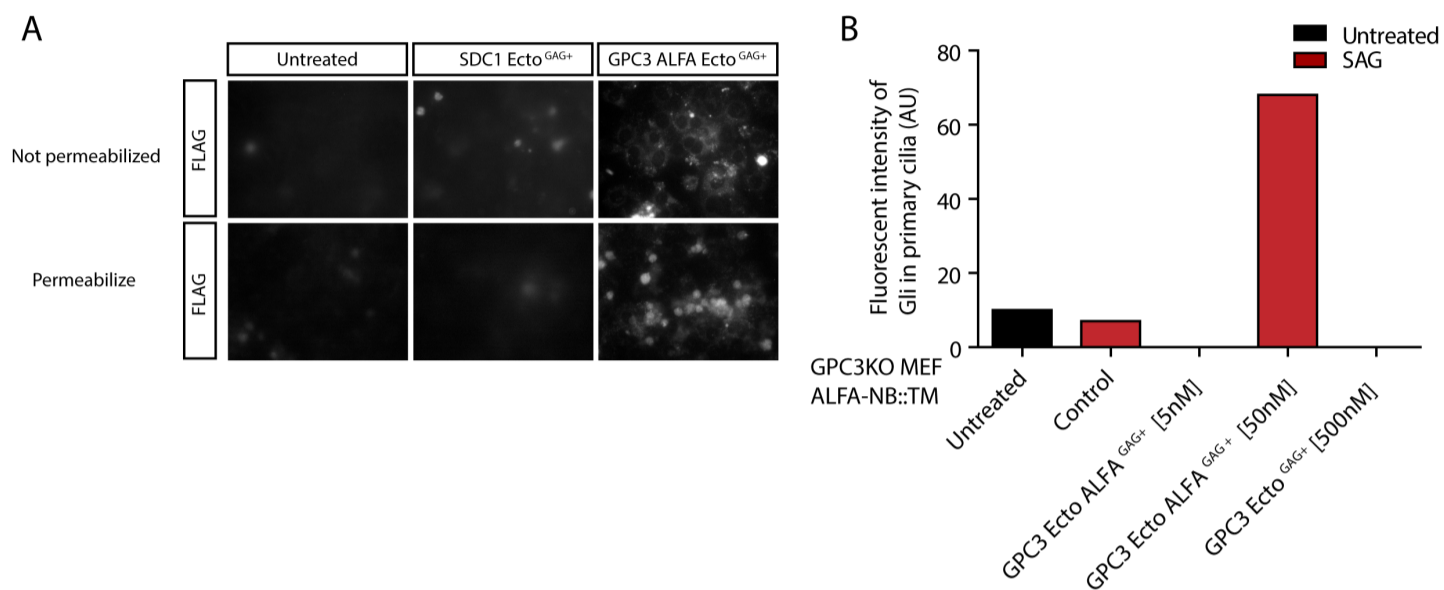

**Fig. S2. Related to Figure 2.**

(A) *Gpc3*<sup>KO</sup> MEFs expressing ALFA-NB::TM were incubated for 24 hours with 50 nM FLAG-tagged GPC3-ALFA-Ecto<sup>GAG+</sup> or SDC1-Ecto<sup>GAG+</sup> (negative control), followed by anti-FLAG immunofluorescence microscopy, with or without permeabilization with 1% Triton X-100. GPC3-ALFA-Ecto<sup>GAG+</sup> is recruited to cells expressing ALFA-NB::TM.

(B) *Gpc3*<sup>KO</sup> MEFs expressing ALFA-NB::TM were incubated with SAG (1 μM), in the presence of the indicated concentrations of purified GPC3-Ecto-ALFA<sup>GAG+</sup> for 6hrs. Ciliary intensity of endogenous Gli protein was measured by immunofluorescence microscopy. 100-150 cilia were measured per condition. While 50 nM GPC3-Ecto-ALFA<sup>GAG+</sup> rescues Gli recruitment to cilia, 500 nM GPC3-Ecto-ALFA<sup>GAG+</sup> is inhibitory.

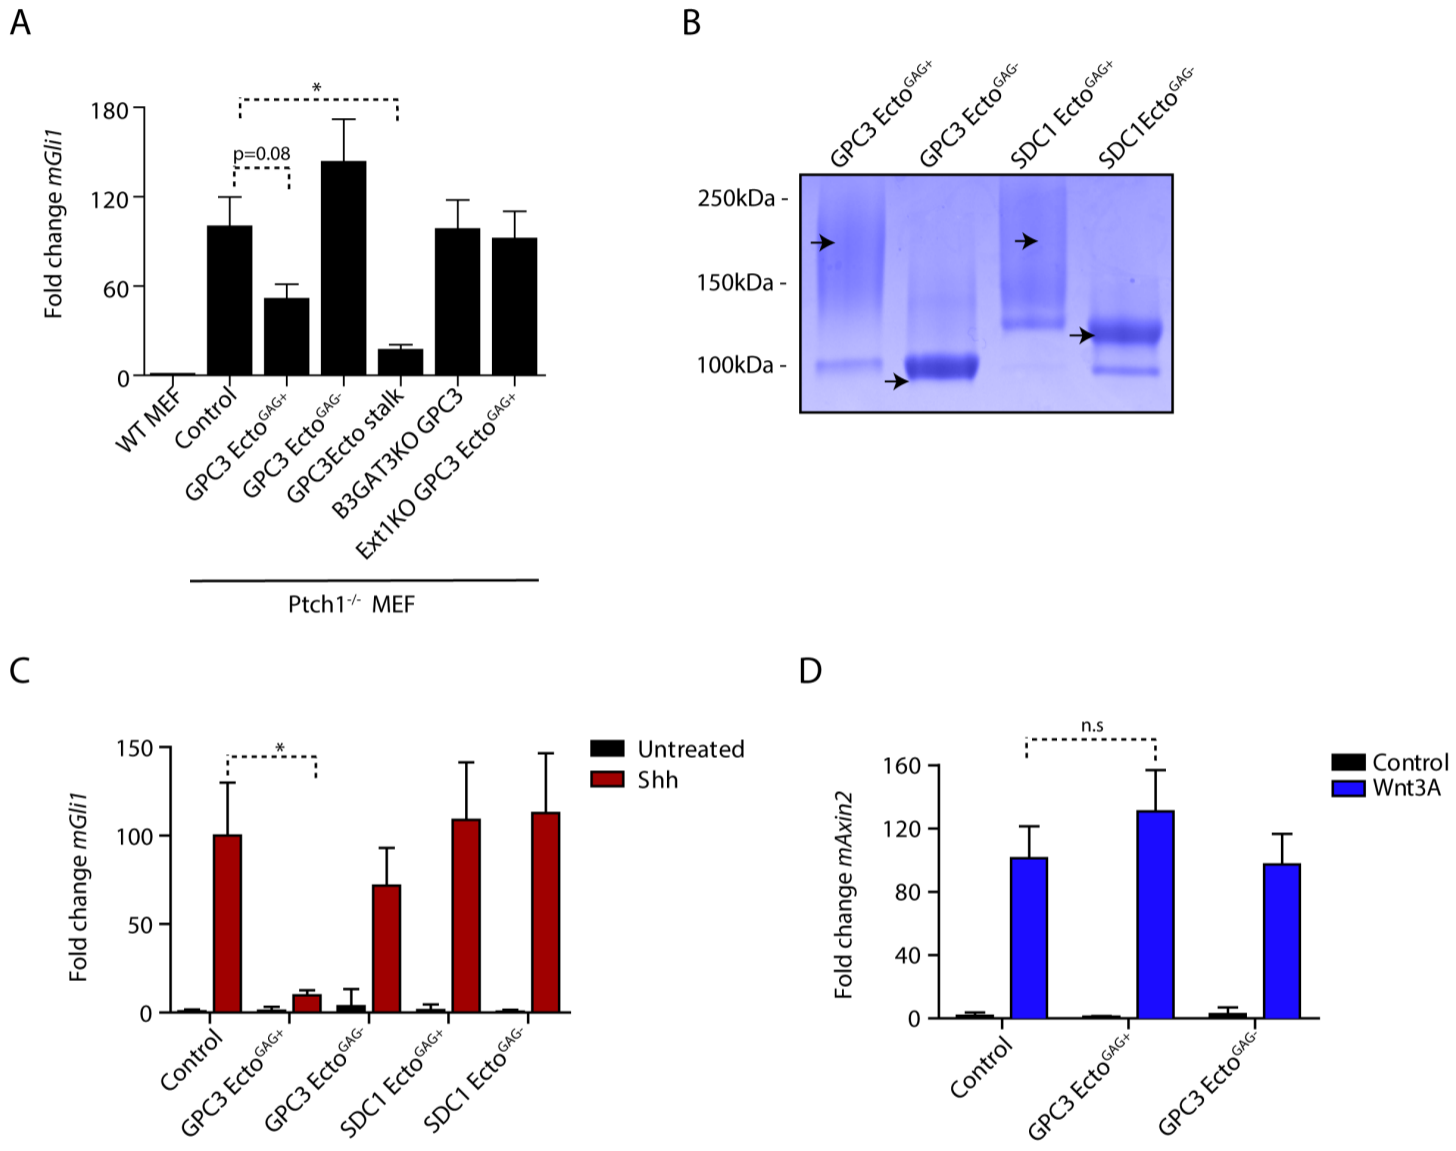

**Fig. S3. Related to Figure 3**

(A) *Ptch1*<sup>-/-</sup> MEF cells were incubated with the indicated purified proteins (1 μM) for 24 hours, and Hh pathway activity was measured by qRT-PCR for *Gli1*. HS-modified GPC3-Ecto and stalk domain antagonize constitutive Hh pathway activation. GPC3-Ecto proteins purified from *EXT1*<sup>KO</sup> or from *B3GAT3*<sup>KO</sup> cells (CS-modified and unmodified, respectively) are inactive. Bars show average fold-change for three replicates, and error bars show SEM. \* denotes statistical significance, p<0.05.

(B) GPC3-Ecto and SDC1-Ecto fused to HaloTag were expressed in HEK293T cells and were affinity purified from conditioned media. The proteins were then separated by size-exclusion chromatography, to isolate GAG-modified and GAG-unmodified fractions, which were analyzed by SDS-PAGE and Coomassie staining. Arrows indicate relevant protein species in each gel lane.

(C) WT MEFs were incubated with Shh or control media for 24 hours, in the absence or presence of the indicated purified proteins (1 μM). Hh signaling was measured by qRT-PCR for *Gli1*. SDC1-Ecto has no effect on Hh signaling, while GPC3-Ecto inhibits signaling in a GAG-dependent manner. Bars show average fold-change for three replicates, and error bars show SEM. \* denotes statistical significance, p<0.05.

(D) As in (C), but with Wnt3A treatment and assaying Wnt pathway activation by qRT-PCR for *Axin2*. GAG-modified and unmodified GPC3-Ecto has no effect on Wnt signaling. Bars show average fold-change for three replicates, and error bars show SEM. \* denotes statistical significance, p<0.05.

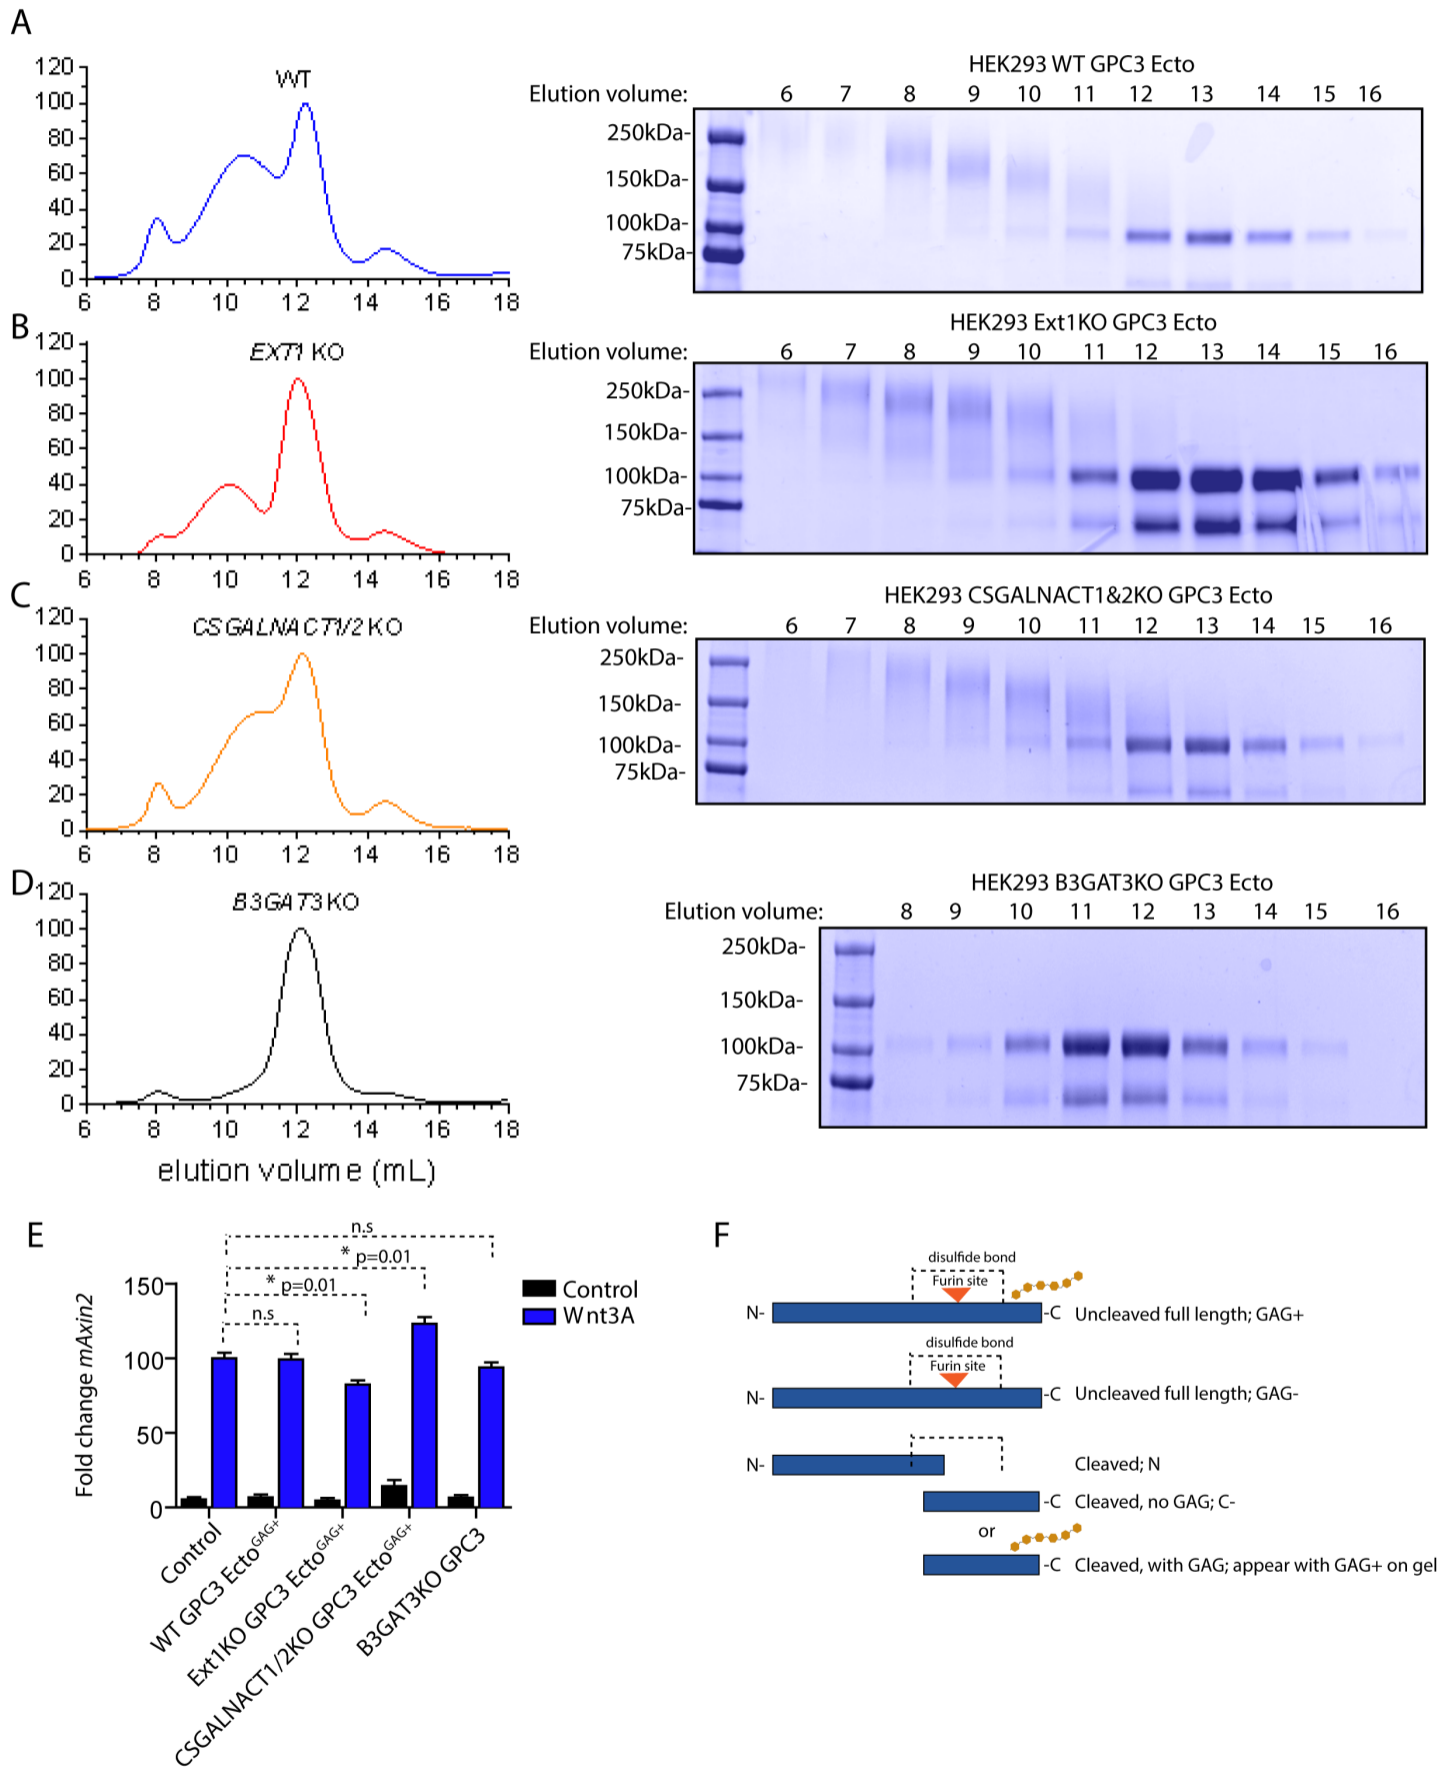

**Fig. S4. Related to Figure 4**

(A) UV trace for size exclusion chromatography of GPC3-Ecto, affinity-purified from media conditioned by WT HEK293T cells (left). The indicated fractions were analyzed by SDS-PAGE and Coomassie staining (right).

(B) As in (A), but with GPC3-Ecto secreted by *Ext1*<sup>KO</sup> cells.

(C) As in (A), but with GPC3-Ecto secreted by *CSGALNACT1,2*<sup>KO</sup> cells.

(D) As in (A), but with GPC3-Ecto secreted by *B3GAT3*<sup>KO</sup> cells.

(E) WT MEFs were incubated with Wnt3A or control media for 24 hours, in the absence or presence of GPC3-Ecto proteins (1 μM), expressed and purified from the indicated cells. Wnt signaling was measured by qRT-PCR for *Axin2*. Bars show average fold-change for three replicates, and error bars show SEM. \* denotes statistical significance, p<0.05. n.s =p>0.05.

(F) Cartoon representation of GPC3 cleavage by Furin, related to Figure 4B.

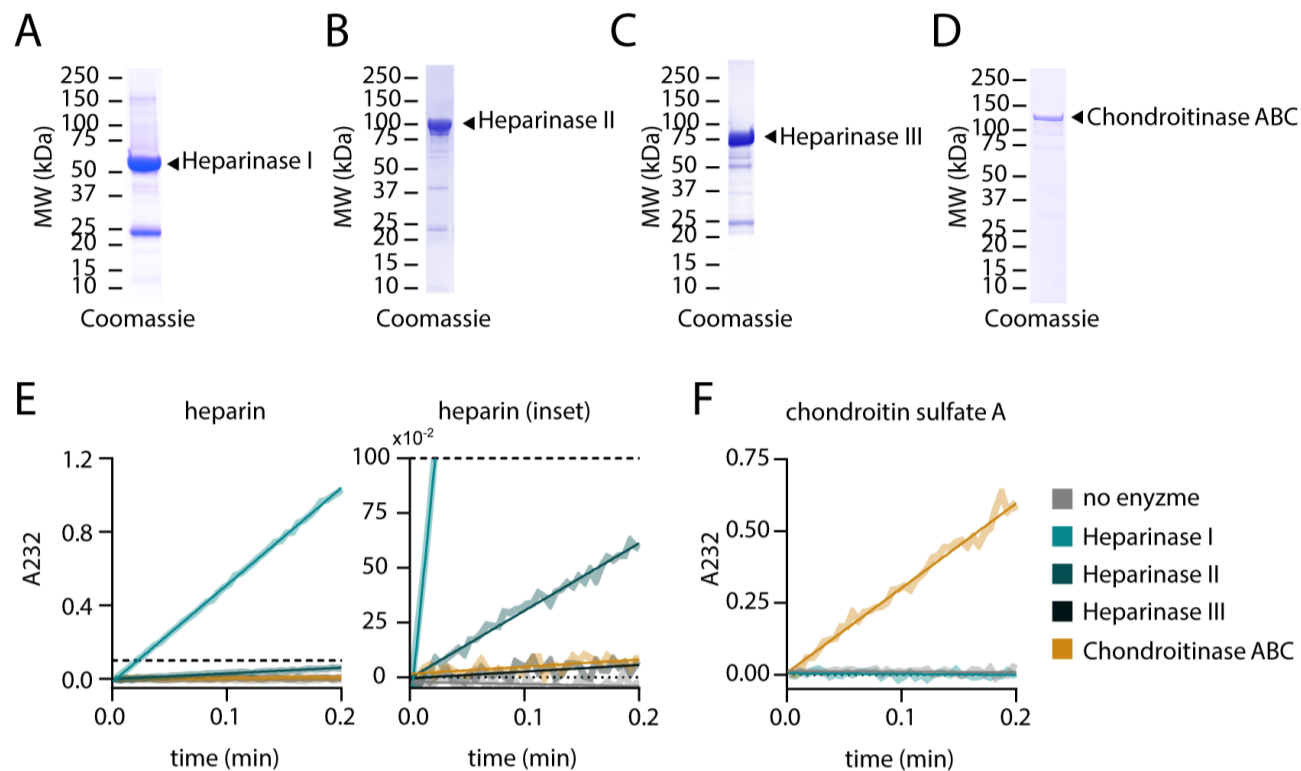

**Fig. S5. Related to Materials and Methods**

(A) GST-tagged *B. thetaiotaomicron* heparinase I (*bt4675*) was purified by glutathione affinity chromatography followed by gel filtration on a Superdex 200 26/60 column. Protein species well separated from the void volume were pooled, concentrated, and analyzed by SDS-PAGE and Coomassie staining.

(B) As in (A), but for *B. thetaiotaomicron* heparinase II (*bt4652*).

(C) As in (A), but for *B. thetaiotaomicron* heparinase III (*bt4657*).

(D) As in (A), but for *B. thetaiotaomicron* chondroitinase ABC (*bt3350*).

(E) Purified recombinant enzymes (20  $\mu$ g) from (A)-(D) were incubated with 1 mg/mL porcine intestinal heparin in a total volume of 1 mL, and liberation of unsaturated non-reducing ends was quantified over time by continuous measurement at A232. Data (thick, light line) are fit with a linear regression (thin, dark line), used to calculate the specific activities reported in Table S4. Heparinase I (left) and heparinase II (see inset, right) act on heparin. Heparinase III, which acts on less highly sulfated HS substrates, and chondroitinase ABC are inactive against the heparin substrate.

(F) As in (E), except assaying enzyme activity on chondroitin sulfate A. Only chondroitinase ABC exhibits activity in this assay.



**Table S1. Generation of null cell lines by CRISPR-Cas9**

| Target Gene       | gRNA # | NCBI Reference Sequence | Target Site Description | gRNA Sequence        | gRNA Orientation | Associated Plasmid | Associated Cell Line |
|-------------------|--------|-------------------------|-------------------------|----------------------|------------------|--------------------|----------------------|
| <i>B3GAT3</i>     | 1      | NM_012200               | Exon 3                  | TTCCGCTGCTCGACACCACG | antisense        | pBMW673            | BMW170.41            |
| <i>EXT1</i>       | 1      | NM_000127               | Exon 1                  | GCCAGAAATGATCCGGACTG | antisense        | pBMW606            | BMW171.17            |
| <i>CSGALNACT1</i> | 1      | NM_001130518            | Exon 4                  | GGGTGCAGGCCAACATGTAC | antisense        | pBMW703            | BMW301.16            |
| <i>CSGALNACT2</i> | 1      | NM_018590               | Exon 2                  | GCCAAACTACCCAGTGAGTA | sense            | pBMW704            | BMW301.16            |
| <i>Gpc3</i>       | 1      | NM_016697               | Exon 2                  | TGAGTTCATACTCGCAGAC  | antisense        | pYCL1              | YCL1.24              |
| <i>Gpc3</i>       | 2      | NM_016697               | Exon 3                  | TGCGGTGGTTATTGCAATGT | sense            | pYCL2              | YCL1.24              |

| Target Gene       | gRNA # | Direction | Barcode Sequence                   | Target Recognition Sequence |
|-------------------|--------|-----------|------------------------------------|-----------------------------|
| <i>B3GAT3</i>     | 1      | Forward   | ACACTCTTTCCCTACACGACGCTCTTCCGATCT  | CCTCTCTTCACACACCTGG         |
| <i>B3GAT3</i>     | 1      | Reverse   | GTGACTGGAGTTCAGACGTGTGCTCTTCCGATCT | CAAAGTAGACGACTCCTTGGGT      |
| <i>EXT1</i>       | 1      | Forward   | ACACTCTTTCCCTACACGACGCTCTTCCGATCT  | TTGTCTCGCCCTTTTGTTTTAT      |
| <i>EXT1</i>       | 1      | Reverse   | GTGACTGGAGTTCAGACGTGTGCTCTTCCGATCT | AAATGTGCACGCTGGAATC         |
| <i>CSGALNACT1</i> | 1      | Forward   | ACACTCTTTCCCTACACGACGCTCTTCCGATCT  | TCCTGAATGATGATGGTTTCG       |
| <i>CSGALNACT1</i> | 1      | Reverse   | GTGACTGGAGTTCAGACGTGTGCTCTTCCGATCT | TGGTACCCTCCTTCCCC           |
| <i>CSGALNACT2</i> | 1      | Forward   | ACACTCTTTCCCTACACGACGCTCTTCCGATCT  | ACAAAGAGCAAGCACCTAGTGA      |
| <i>CSGALNACT2</i> | 1      | Reverse   | GTGACTGGAGTTCAGACGTGTGCTCTTCCGATCT | CTTTTCTCAGGATGGCGAGT        |
| <i>Gpc3</i>       | 1      | Forward   | ACACTCTTTCCCTACACGACGCTCTTCCGATCT  | CAACATGCTGCTCAAGAAAGAT      |
| <i>Gpc3</i>       | 1      | Reverse   | GTGACTGGAGTTCAGACGTGTGCTCTTCCGATCT | GCCATTGAACAGTACATCGAAA      |
| <i>Gpc3</i>       | 2      | Forward   | ACACTCTTTCCCTACACGACGCTCTTCCGATCT  | ACACTACCGACCACCTCAAGTT      |
| <i>Gpc3</i>       | 2      | Reverse   | GTGACTGGAGTTCAGACGTGTGCTCTTCCGATCT | TACTTGTCGATCTCCACCACAC      |

| gRNA # | Allele 1 Sequence       | Allele 1 Type  | Allele 1 % Aligned Reads | Allele 2 Sequence          | Allele 2 Type                  | Allele 2 % Aligned Reads | Allele 3 Sequence       | Allele 3 Type  | Allele 3 % Aligned Reads |
|--------|-------------------------|----------------|--------------------------|----------------------------|--------------------------------|--------------------------|-------------------------|----------------|--------------------------|
| 1      | AGCCTGGCTG//TGGGTGGGGA  | 68-nt deletion | 51%                      | CGTG-TGTCGAGCAGCGGAA       | 1-nt deletion                  | 26%                      | CGTGG(G)TGTCGAGCAGCGGAA | 1-nt insertion | 23%                      |
| 1      | GCACCACCCC//CCGCTTCCCG  | 20-nt deletion | 92%                      | GGCTTGCACC//[CCC]CCCGCTTCC | 20-nt deletion / 3-nt mutation | 8%                       | --                      | --             | --                       |
| 1      | CTGTGCTATC//ACTGCCAGG   | 53-nt deletion | 74%                      | GTA--TGTTGGCCTGCACCC       | 2-nt deletion                  | 26%                      | --                      | --             | --                       |
| 1      | GCCAAACTACCCAGTGA(A)GTA | 1-nt insertion | 100%                     | --                         | --                             | --                       | --                      | --             | --                       |
| 1      | GTCTGCGAGTATGGACTCA     | wild-type      | 72%                      | GT-----GGAAGTCA            | 10-nt deletion                 | 28%                      | --                      | --             | --                       |
| 2      | TGCG-TGGTATTGCAATGT     | 1-nt deletion  | 35%                      | TGCGG(G)TGGTTATTGCAATGT    | 1-nt insertion                 | 30%                      | TGCGGT---TATTGCAATGT    | 3-nt deletion  | 35%                      |

**Table S2. List of expression constructs**

| pBMW Identifier | Vector  | Promoter | Short Name                      | Full Transgene                              | Eukaryotic Resistance Marker | Bacterial Resistance Marker | Category                    | Subcategory                      | Reference                                    |
|-----------------|---------|----------|---------------------------------|---------------------------------------------|------------------------------|-----------------------------|-----------------------------|----------------------------------|----------------------------------------------|
| pBMW673         | pX459   | U6       | <i>B3GAT3</i> <sup>KO</sup>     | hB3GAT3_CRISPR_KO_gRNA1                     | Puro                         | Amp                         | CRISPR knockout             | GAG biosyntheses                 | this paper                                   |
| pBMW606         | pX459   | U6       | <i>EXT1</i> <sup>KO</sup>       | hEXT1 CRISPR KO gRNA1                       | Puro                         | Amp                         | CRISPR knockout             | GAG biosyntheses                 | this paper                                   |
| pBMW703         | pX459   | U6       | <i>CSGALNACT1</i> <sup>KO</sup> | hCSGALNACT1_CRISPR_KO_gRNA1                 | Puro                         | Amp                         | CRISPR knockout             | GAG biosyntheses                 | this paper                                   |
| pBMW704         | pX459   | U6       | <i>CSGALNACT2</i> <sup>KO</sup> | hCSGALNACT2_CRISPR_KO_gRNA1                 | Puro                         | Amp                         | CRISPR knockout             | GAG biosyntheses                 | this paper                                   |
| pYCL1           | pX459   | U6       | <i>Gpc3</i> <sup>KO</sup>       | mGpc3 CRISPR KO gRNA1                       | Puro                         | Amp                         | CRISPR knockout             | <i>Gpc3</i> <sup>KO</sup>        | this paper                                   |
| pYCL2           | pX459   | U6       | <i>Gpc3</i> <sup>KO</sup>       | mGpc3 CRISPR KO gRNA2                       | Puro                         | Amp                         | CRISPR knockout             | <i>Gpc3</i> <sup>KO</sup>        | this paper                                   |
| pAS63           | pCS2    | IE94-CMV | Smo                             | mSMO-FL::fTEV-EGFP                          | --                           | Amp                         | binding experiments         | negative control                 | Wierbowski et al., 2020                      |
| pAS58           | pHAG E2 | CAG-CMV  | Ptch1                           | mPTCH1-Del(C)Tail::fEGFP                    | Blast                        | Amp                         | binding experiments         | positive control                 | Wierbowski et al., 2020                      |
| pBMW177         | pHAG E2 | CAG-CMV  | Cdon                            | hCDON-Del(C)TM1::hCDON-Del(N)FNs::fTEV-EGFP | Blast                        | Amp                         | binding experiments         | positive control                 | Wierbowski et al., 2020                      |
| pBMW281         | pCS2    | IE94-CMV | Boc                             | hBOC-Del(C)TM1::hBOC-Del(N)FNs::fTEV-EGFP   | --                           | Amp                         | binding experiments         | positive control                 | Wierbowski et al., 2020                      |
| pBMW241         | pCS2    | IE94-CMV | Hhip                            | EGFPf::hHHIP-FL                             | --                           | Amp                         | binding experiments         | positive control                 | this paper                                   |
| pBMW304         | pHAG E2 | CAG-CMV  | scFv5E1::TM                     | scFv5E1-LH::hCDON-Del(N)FNs::fTEV-EGFP      | Blast                        | Amp                         | binding experiments         | positive control                 | Wierbowski et al., 2020; Maun et al., 2010   |
| pBMW243         | pCS2    | IE94-CMV | GPC3                            | EGFPf::mGPC3-FL                             | --                           | Amp                         | binding experiments         | experimental sample              | this paper                                   |
| pBMW244         | pCS2    | IE94-CMV | GPC5                            | EGFPf::hGPC5-FL                             | --                           | Amp                         | binding experiments         | experimental sample              | this paper                                   |
| pAS295          | pHAG E2 | CAG-CMV  | ALFA-NB::TM                     | HPC-NbALFA::hCDON-TM-CTD                    | Blast                        | Amp                         | stable mammalian expression | ALFA-NB recruitment system       | Wierbowski et al., 2020; Gotzke et al., 2019 |
| pAS283          | pHAG E2 | CAG-CMV  | GPC3                            | FLAG-mGPC3-FL                               | Blast                        | Amp                         | stable mammalian expression | <i>Gpc3</i> <sup>KO</sup> rescue | this paper                                   |
| pAS173          | pHAG E2 | CAG-CMV  | GPC3-Ecto                       | FLAG-HT7-PreSci::mGPC3-Del(C)GPI            | Blast                        | Amp                         | stable mammalian            | <i>Gpc3</i> <sup>KO</sup> rescue | this paper                                   |

|         |           |          |                                  |                                                |       |     |                                        | an expression                                                        |                         |
|---------|-----------|----------|----------------------------------|------------------------------------------------|-------|-----|----------------------------------------|----------------------------------------------------------------------|-------------------------|
| pAS272  | pTWI<br>N | T7lac    | unlipidated<br>Shh               | SHH(C24A)-N                                    | --    | Amp | bacterial protein production           | Shh ligand for binding experiments; competitor for Ptch1 interaction | Wierbowski et al., 2020 |
| pBMW643 | pGEX-2TK  | Ptac     | Heparinase I                     | GST-Thromb::B.theta.HeparinaseI                | --    | Amp | bacterial protein production           | heparinases                                                          | this paper              |
| pBMW644 | pGEX-2TK  | Ptac     | Heparinase II                    | GST-Thromb::B.theta.HeparinaseII               | --    | Amp | bacterial protein production           | heparinases                                                          | this paper              |
| pBMW645 | pGEX-2TK  | Ptac     | Heparinase III                   | GST-Thromb::B.theta.HeparinaseIII              | --    | Amp | bacterial protein production           | heparinases                                                          | this paper              |
| pBMW678 | pGEX-2TK  | Ptac     | Chondroitinase ABC               | GST-Thromb::B.theta.Chondroitinase ABC         | --    | Amp | bacterial protein production           | chondroitinase                                                       | this paper              |
| pAS48   | pCS2      | IE94-CMV | Shh                              | hSHH-N                                         | --    | Amp | transient mammalian protein production | Shh conditioned medium production                                    | Wierbowski et al., 2020 |
| pAS75   | pCS2      | IE94-CMV | palmitoylated<br>Shh             | hSHH-N::fHT7-PreSci-HPC                        | --    | Amp | transient mammalian protein production | Shh ligand for binding experiments                                   | Wierbowski et al., 2020 |
| pBMW814 | pHAG E2   | CAG-CMV  | scFv5E1                          | scFv5E1::PreSci-fHT7-HPC                       | Blast | Amp | stable mammalian protein production    | competitor for Ptch1 interaction                                     | Wierbowski et al., 2020 |
| pAS290  | pHAG E2   | CAG-CMV  | GPC3-Ecto-ALFA                   | FLAG-mGPC3-Ecto-ALFA                           | Blast | Amp | stable mammalian protein production    | ALFA-NB recruitment system                                           | this paper              |
| pBMW637 | pHAG E2   | CAG-CMV  | SDC1-Ecto                        | hSDC1-Ecto::PreSci-fHT7-HPC                    | Blast | Amp | stable mammalian protein production    | negative control                                                     | this paper              |
| pAS174  | pHAG E2   | CAG-CMV  | GPC3-Ecto                        | mGPC3-Del(C)GPI::fHT7-PreSci-HPC               | Blast | Amp | stable mammalian protein production    | experimental sample                                                  | this paper              |
| pBMW697 | pHAG E2   | CAG-CMV  | GPC3-Ecto <sup>PreScission</sup> | FLAG-mGPC3-Core::PreSci::mGPC3-Stalk::fHT7-HPC | Blast | Amp | stable mammalian protein production    | cleavable GPC3-Ecto                                                  | this paper              |
| pBMW675 | pHAG E2   | CAG-CMV  | GPC3-Stalk                       | HPC-HT7-PreSci::mGPC3-Stalk                    | Blast | Amp | stable mammalian protein production    | stalk sufficiency test                                               | this paper              |

|             |            |             |                                                           |                                              |       |     |                                                      |                           |            |
|-------------|------------|-------------|-----------------------------------------------------------|----------------------------------------------|-------|-----|------------------------------------------------------|---------------------------|------------|
| pBMW5<br>54 | pHAG<br>E2 | CAG-<br>CMV | GPC1-Ecto                                                 | hGPC1-Del(C)GPI::fHT7-<br>PreSci-HPC         | Blast | Amp | stable<br>mammali<br>an<br>protein<br>productio<br>n | core<br>necessity<br>test | this paper |
| pBMW5<br>55 | pHAG<br>E2 | CAG-<br>CMV | GPC2-Ecto                                                 | hGPC2-Del(C)GPI::fHT7-<br>PreSci-HPC         | Blast | Amp | stable<br>mammali<br>an<br>protein<br>productio<br>n | core<br>necessity<br>test | this paper |
| pBMW8<br>33 | pHAG<br>E2 | CAG-<br>CMV | GPC1 <sup>core</sup> -<br>GPC3 <sup>stalk</sup> -<br>Ecto | hGPC1-Core::mGPC3-<br>Stalk::fHT7-PreSci-HPC | Blast | Amp | stable<br>mammali<br>an<br>protein<br>productio<br>n | core<br>necessity<br>test | this paper |
| pBMW8<br>34 | pHAG<br>E2 | CAG-<br>CMV | GPC3 <sup>core</sup> -<br>GPC1 <sup>stalk</sup> -<br>Ecto | mGPC3-Core::hGPC1-<br>Stalk::fHT7-PreSci-HPC | Blast | Amp | stable<br>mammali<br>an<br>protein<br>productio<br>n | core<br>necessity<br>test | this paper |
| pBMW8<br>17 | pHAG<br>E2 | CAG-<br>CMV | GPC2 <sup>core</sup> -<br>GPC3 <sup>stalk</sup> -<br>Ecto | hGPC2-Core::mGPC3-<br>Stalk::fHT7-PreSci-HPC | Blast | Amp | stable<br>mammali<br>an<br>protein<br>productio<br>n | core<br>necessity<br>test | this paper |
| pBMW8<br>18 | pHAG<br>E2 | CAG-<br>CMV | GPC3 <sup>core</sup> -<br>GPC2 <sup>stalk</sup> -<br>Ecto | mGPC3-Core::hGPC2-<br>Stalk::fHT7-PreSci-HPC | Blast | Amp | stable<br>mammali<br>an<br>protein<br>productio<br>n | core<br>necessity<br>test | this paper |

**Table S3. List of qRT-PCR primers**

| Target        | Forward qPCR Primer    | Reverse qPCR Primer   |
|---------------|------------------------|-----------------------|
| <i>mGli1</i>  | TACCATGAGCCCTTCTTTAGGA | GCATCATTGAACCCCGAGTAG |
| <i>mCyclo</i> | GGAGATGGCACAGGAGGAA    | GCCCGTAGTGCTTCAGCTT   |
| <i>mAxin2</i> | GCTCCAGAAGATCACAAAGAGC | AGCTTTGAGCCTTCAGCATC  |

**Table S4. Specific activities of recombinant heparinases and chondroitinase**

| Gene          | Protein                            | Substrate                        | Specific Activity<br>(pmol/min/μg) |
|---------------|------------------------------------|----------------------------------|------------------------------------|
| <i>bt3350</i> | <i>B. theta</i> Chondroitinase ABC | chondroitin sulfate A<br>heparin | 38802.63<br><i>N.D.</i>            |
| <i>bt4675</i> | <i>B. theta</i> Heparinase I       | chondroitin sulfate A<br>heparin | <i>N.D.</i><br>69500.00            |
| <i>bt4652</i> | <i>B. theta</i> Heparinase II      | chondroitin sulfate A<br>heparin | <i>N.D.</i><br>4057.89             |
| <i>bt4657</i> | <i>B. theta</i> Heparinase III     | chondroitin sulfate A<br>heparin | <i>N.D.</i><br><i>N.D.</i>         |
